# Supplementary material for: Direct laser cooling schemes for the triatomic SOH and SeOH molecules based on ab initio electronic properties
Source: Royal Society of Chemistry journal article supplement (doi:10.1039/d0cp04963h), 2020-12-23
Supplement: d0cp04963h1.pdf [file d0cp04963h1.pdf]

## Supplementary information for:

### Direct Laser Cooling Schemes for the Triatomic SOH and SeOH

#### Molecules Based on Ab Initio Calculations.

Li Liu, Chuan-Lu Yang\*, Zhao-Peng Sun, Mei-Shan Wang and Xiao-Guang Ma

This supplement provides further details of the supplementary data sets relevant to the text. In particular, the equilibrium geometrical structures and fundamental frequencies of the ground and low-lying excited states for 168 electronic states of 28 triatomic molecules containing OH are given by the new method, which can rapidly identify the preferable one among many candidate polyatomic molecules. And the equilibrium structures and fundamental frequencies for the screened molecules by MCSCF are also calculated by using TD/DFT method implemented in Gaussian 16. In addition, the fitting parameters and root mean square errors of two- and three-body terms for SOH and SeOH are listed.

#### List of Tables:

- **Table S1.** The equilibrium geometrical structures and fundamental frequencies for 26 triatomic molecules containing OH.
- **Table S2.** By using TD/DFT method implemented in Gaussian 16, the equilibrium structures and fundamental frequencies for the screened molecules (CaOH, SrOH, BaOH, RaOH, SOH, and SeOH) by MCSCF are calculated.
- **Table S3.** Fitting parameters and root mean square errors (in  $\text{cm}^{-1}$ ) of the two-body terms for SOH and SeOH molecules.

---

\*Corresponding author. E-mail address: ycl@ldu.edu.cn. (C.L. Yang).

*School of Physics and Optoelectronic Engineering, Ludong University, Yantai 264025, the People's Republic of China*

- **Table S4.** Fitting parameters and root mean square errors (in  $\text{cm}^{-1}$ ) of the three-body terms for SOH and SeOH molecules.

Table S1 Calculated and experimental/theoretical molecular parameters for MOH (M is the second- to fifth-period elements of the first to the sixth main group in the periodic table, and includes Cs, Ba, Fr and Ra.). For the triatomic molecules (M=Li–Mg and Ca–Se, including H, P, S), the structural parameters are calculated by MCSCF/cc-pVTZ. For M=Rb and Sr, the basis set of ECP28MDF is used. For M=In–Te, including Si and Al, the cc-pVTZ-DK basis set is employed, while for M=K and Ba, def2-QZVP and ECP46MDF basis sets are adopted, respectively. And for M=Cs, Fr and Ra, ECP78MDF basis set is used. The blue part is the difference in bond lengths, bond angle, and vibrational frequencies between the lowest two electronic states of each molecule. Among them, the excited states are not optimized relative to the ground state of M = As, Sb, and Ga. The yellow mark is the molecules meeting the requirements of the laser cooling candidates. The internuclear distances  $R_i$  are given in Å and the harmonic frequencies of normal mode  $\nu_i$  in  $\text{cm}^{-1}$ . The X represents the symmetry of state because all the calculations are carried out without symmetry.

|            |                  | $R_{\text{O-H}}$ | $R_{\text{O-M}}$ | $\angle \text{M-O-H}$ | 2       | 1       | 3       | energy       |                   |
|------------|------------------|------------------|------------------|-----------------------|---------|---------|---------|--------------|-------------------|
| LiOH       | 1 <sup>1</sup> X | 0.952            | 1.586            | 179.999               | 342.23  | 965.70  | 4010.34 | -83.0829022  |                   |
|            |                  | 0.9499           | 1.5857           | 180                   | 289     | 923     | 3831    |              | Ref. <sup>1</sup> |
|            |                  | 0.934            | 1.590            | 180                   | 298     | 1014    | 4366    |              | Exp. <sup>2</sup> |
|            | 2 <sup>1</sup> X | 0.978            | 2.098            | 114.133               | 280.50  | 401.50  | 3679.24 | -82.9445385  |                   |
|            | 3 <sup>1</sup> X | 0.973            | 2.094            | 180.000               | 244.2   | 491.16  | 3755.90 | -82.94505605 |                   |
|            | 1 <sup>3</sup> X | 0.978            | 2.074            | 114.697               | 311.36  | 374.22  | 3682.25 | -82.9551657  |                   |
|            | 2 <sup>3</sup> X | 0.973            | 2.067            | 179.989               | 270.99  | 365.05  | 3758.80 | -82.9520152  |                   |
|            | 3 <sup>3</sup> X | 0.969            | 1.996            | 171.796               | 355.93  | 364.03  | 3790.84 | -82.86923674 |                   |
| difference |                  | 0.021            | 0.508            | 0.001                 | 98.03   | 474.54  | 254.44  | 0.13784615   |                   |
| BeOH       | 1 <sup>2</sup> X | 0.958            | 1.421            | 129.053               | 494.93  | 1242.16 | 3928.80 | -90.2321731  |                   |
|            |                  | 0.943            | 1.401            | 139.010               |         |         |         |              | Ref. <sup>3</sup> |
|            |                  | 0.934            | 1.399            |                       | 306     | 1322    | 4377    |              | Ref. <sup>4</sup> |
|            |                  | 0.949            | 1.397            | 141.000               | 100.2   | 1263.4  | 38684   |              | Ref. <sup>5</sup> |
|            | 2 <sup>2</sup> X | 0.963            | 1.475            | 111.677               | 900.92  | 1115.69 | 3824.00 | -90.0850508  |                   |
|            |                  | 0.949            | 1.446            | 118.160               |         |         |         |              | Ref. <sup>3</sup> |
|            |                  | 3 <sup>2</sup> X | 0.959            | 1.481                 | 120.314 | 580.06  | 1053.86 | 3875.23      | -90.03029058      |

|            |                  |          |          |          |                 |         |         |               |                    |
|------------|------------------|----------|----------|----------|-----------------|---------|---------|---------------|--------------------|
|            | 1 <sup>4</sup> X | 0.982    | 1.842    | 102.965  | 437.11          | 605.70  | 3619.20 | -89.9927095   |                    |
|            | 2 <sup>4</sup> X | 0.983    | 1.852    | 108.965  | 419.90          | 611.15  | 3609.70 | -89.9944047   |                    |
|            | 3 <sup>4</sup> X |          |          |          | Dissociation    |         |         |               |                    |
| difference |                  | 0.005    | 0.054    | 17.376   | 405.99          | 126.47  | 104.8   | 0.1471223     |                    |
| BOH        | 1 <sup>1</sup> X | 0.970    | 1.315    | 115.864  | 703.59          | 1406.89 | 3815.20 | -100.2465496  |                    |
|            |                  | 0.949/   | 1.303/   | 122.3/   |                 |         |         |               | Ref. <sup>6</sup>  |
|            |                  | 0.944    | 1.289    | 122.4    |                 |         |         |               |                    |
|            |                  | 0.964    | 1.312    | 117.0    | 671             | 1382    | 3881    |               | Ref. <sup>7</sup>  |
|            | 2 <sup>1</sup> X | 1.557    | 1.263    | 111.398  | 618.54          | 1446.67 | 2739.30 | -100.0980987  |                    |
|            | 3 <sup>1</sup> X | 0.974    | 1.431    | 106.853  | 822.00          | 1014.78 | 3699.52 | -99.98977667  |                    |
|            | 1 <sup>3</sup> X | 0.969    | 1.355    | 110.900  | 1117.65         | 1350.31 | 3673.90 | -100.1323634  |                    |
|            |                  |          |          |          | 1094            | 1328    | 3794    |               | Ref. <sup>7</sup>  |
|            | 2 <sup>3</sup> X | 0.961    | 1.374    | 116.644  | 752.38          | 1275.10 | 3865.40 | -100.1002726  |                    |
|            | 3 <sup>3</sup> X |          |          |          | Dissociation    |         |         |               |                    |
| difference |                  | 0.587    | 0.052    | 4.466    | 85.05           | 39.78   | 1075.9  | 0.1484509     |                    |
| COH        | 1 <sup>2</sup> X | 0.983    | 1.289    | 110.426  | 1189.84         | 1378.62 | 3415.20 | -113.3280569  |                    |
|            |                  | 0.980    | 1.300    | 111.7    | 1167            | 1382    | 3613    |               | Ref. <sup>8</sup>  |
|            |                  | 0.976    | 1.273    | 112.956  | 1146.6          | 1402.6  | 3489.1  |               | Ref. <sup>9</sup>  |
|            | 2 <sup>2</sup> X | 0.969    | 1.327    | 111.540  | 802.58          | 1271.06 | 3776.60 | -113.2893471  |                    |
|            |                  | 0.96211/ | 1.30507/ | 114.386/ | 705.0/          | 1317.7/ | 3847.4/ |               | Ref. <sup>9</sup>  |
|            |                  | 0.96388  | 1.31398  | 117.006  | 706.7           | 1289.3  | 3834.2  |               |                    |
|            | 3 <sup>2</sup> X |          |          |          | Non-convergence |         |         |               |                    |
|            | 1 <sup>4</sup> X | 0.968    | 1.399    | 104.762  | 1067.07         | 1297.97 | 3717.90 | -113.1976147  |                    |
|            | 2 <sup>4</sup> X |          |          |          | Dissociation    |         |         |               |                    |
|            | 3 <sup>4</sup> X |          |          |          | Dissociation    |         |         |               |                    |
| difference |                  | 0.014    | 0.038    | 1.114    | 387.26          | 107.56  | 361.4   | 0.0387099     |                    |
| NOH        | 1 <sup>1</sup> X | 0.993    | 1.280    | 109.142  | 1206.69         | 1464.32 | 3197.50 | -129.8904345  |                    |
|            |                  | 0.985/   | 1.263/   | 110.42/  |                 |         |         |               | Ref. <sup>10</sup> |
|            |                  | 0.984/   | 1.265    | 110.30   | 1238            | 1430    | 2928    |               |                    |
|            | 2 <sup>1</sup> X | 0.979    | 1.332    | 106.616  | 1119.80         | 1252.14 | 3528.40 | -129.8600196  |                    |
|            | 3 <sup>1</sup> X | 0.972    | 1.380    | 106.581  | 856.96          | 1082.29 | 3726.01 | -129.80783679 |                    |
|            | 1 <sup>3</sup> X | 0.972    | 1.353    | 104.990  | 1098.21         | 1272.63 | 3658.60 | -129.9159503  |                    |
|            |                  | 0.968    | 1.326    | 107.47   | 1108            | 1215    | 3523    |               | Ref. <sup>10</sup> |
|            | 2 <sup>3</sup> X |          |          |          | Dissociation    |         |         |               |                    |
|            | 3 <sup>3</sup> X | 0.976    | 2.205    | 104.644  | 180.46          | 290.24  | 3634.60 | -129.8989907  |                    |
| difference |                  | 0.004    | 0.852    | 0.346    | 917.75          | 982.39  | 24      | 0.0169596     |                    |
| O2H        | 1 <sup>2</sup> X | 0.974    | 1.360    | 102.699  | 1051.66         | 1423.81 | 3615.90 | -150.3166449  |                    |
|            |                  | 0.971    | 1.330    | 104.3    | 1111.9          | 1413.3  | 3482.4  |               | Exp. <sup>11</sup> |
|            |                  | 0.954    | 1.370    | 104      | 1099.31         | 1381.1  | 3441.3  |               | Ref. <sup>12</sup> |
|            | 2 <sup>2</sup> X | 0.973    | 1.442    | 99.420   | 863.46          | 1261.05 | 3683.80 | -150.2873047  |                    |
|            | 3 <sup>2</sup> X |          |          |          | Dissociation    |         |         |               |                    |
|            | 1 <sup>4</sup> X |          |          |          | Dissociation    |         |         |               |                    |
|            | 2 <sup>4</sup> X |          |          |          | Dissociation    |         |         |               |                    |

|            |                  |        |        |         |                   |         |         |               |                    |
|------------|------------------|--------|--------|---------|-------------------|---------|---------|---------------|--------------------|
|            | 3 <sup>4</sup> X |        |        |         | Dissociation      |         |         |               |                    |
| difference |                  | 0.001  | 0.082  | 3.279   | 188.2             | 162.76  | 67.9    | 0.0293402     |                    |
| NaOH       | 1 <sup>1</sup> X | 0.955  | 1.956  | 179.995 | 263.05            | 569.04  | 3915.10 | -237.4269107  |                    |
|            |                  | 0.96   | 1.95   |         |                   | 431     |         |               | Exp. <sup>13</sup> |
|            | 2 <sup>1</sup> X | 0.975  | 2.699  | 126.397 | 89.91             | 215.75  | 3716.83 | -237.36880952 |                    |
|            | 3 <sup>1</sup> X |        |        |         | virtual frequency |         |         |               |                    |
|            | 1 <sup>3</sup> X | 0.976  | 2.631  | 119.020 | 120.66            | 245.80  | 3713.30 | -237.3754286  |                    |
|            | 2 <sup>3</sup> X | 0.974  | 2.643  | 180.042 | 97.43             | 269.52  | 3741.50 | -237.3742288  |                    |
|            | 3 <sup>3</sup> X | 0.973  | 2.359  | 179.734 | 212.53            | 268.28  | 3754.47 | -237.28238159 |                    |
| difference |                  | 0.02   | 0.743  | 53.598  | 173.14            | 353.29  | 198.27  | 0.05810118    |                    |
| MgOH       | 1 <sup>2</sup> X | 0.955  | 1.804  | 140.911 | 286.11            | 741.93  | 3949.30 | -275.2102068  |                    |
|            |                  | 0.872  | 1.780  |         |                   |         |         |               | Exp. <sup>14</sup> |
|            |                  | 0.941  | 1.773  |         | 389               | 785     | 4301    |               | Ref. <sup>4</sup>  |
|            |                  | 0.9467 | 1.7745 |         | 160               | 747     | 3851    |               | Ref. <sup>15</sup> |
|            | 2 <sup>2</sup> X | 0.964  | 1.837  | 112.378 | 633.47            | 748.95  | 3828.80 | -275.0890778  |                    |
|            | 3 <sup>2</sup> X | 0.982  | 2.105  | 103.944 | 265.10            | 881.45  | 3593.94 | -275.07416817 |                    |
|            | 1 <sup>4</sup> X | 0.980  | 2.351  | 104.086 | 208.31            | 456.53  | 3636.60 | -275.0231675  |                    |
|            | 2 <sup>4</sup> X | 0.979  | 2.363  | 116.352 | 198.09            | 428.22  | 3654.90 | -275.0220575  |                    |
|            | 3 <sup>4</sup> X | 0.970  | 2.383  | 173.748 | 152.48            | 352.08  | 3739.89 | -275.00315871 |                    |
| difference |                  | 0.009  | 0.033  | 28.533  | 347.36            | 7.02    | 120.5   | 0.1211290     |                    |
| AlOH       | 1 <sup>1</sup> X | 0.951  | 1.686  | 172.055 | 144.54            | 836.33  | 4017.40 | -317.5407782  |                    |
|            |                  | 0.950  | 1.691  | 162.26  | 98                | 834     | 4035    |               | Exp. <sup>16</sup> |
|            | 2 <sup>1</sup> X | 0.968  | 1.783  | 107.585 | 609.78            | 932.90  | 3773.90 | -317.3601877  |                    |
|            |                  |        |        |         | 654.2             | 825.2   | 3258.4  |               | Exp. <sup>17</sup> |
|            | 3 <sup>1</sup> X |        |        |         | Dissociation      |         |         |               |                    |
|            | 1 <sup>3</sup> X | 0.963  | 1.730  | 114.555 | 739.09            | 834.02  | 3820.00 | -317.4208038  |                    |
|            | 2 <sup>3</sup> X | 0.956  | 1.718  | 126.175 | 506.17            | 824.74  | 3920.20 | -317.4085655  |                    |
|            | 3 <sup>3</sup> X | 0.986  | 1.703  | 115.910 | 576.87            | 756.11  | 3332.44 | -317.29772882 |                    |
| difference |                  | 0.017  | 0.097  | 64.47   | 465.24            | 96.57   | 243.50  | 0.1805905     |                    |
| SiOH       | 1 <sup>2</sup> X | 0.966  | 1.671  | 114.330 | 827.12            | 879.39  | 3771.10 | -364.4664058  |                    |
|            |                  | 0.969  | 1.647  | 118.5   |                   |         |         |               | Exp. <sup>18</sup> |
|            |                  | 0.9603 | 1.6508 | 118.57  |                   |         |         |               | Ref. <sup>18</sup> |
|            | 2 <sup>2</sup> X | 0.959  | 1.666  | 125.933 | 532.87            | 852.32  | 3890.00 | -364.4503606  |                    |
|            |                  | 0.9532 | 1.6380 | 137.90  |                   |         |         |               | Ref. <sup>18</sup> |
|            | 3 <sup>2</sup> X |        |        |         | virtual frequency |         |         |               |                    |
|            | 1 <sup>4</sup> X | 0.966  | 1.712  | 108.245 | 737.31            | 1008.65 | 3762.90 | -364.3484888  |                    |
|            | 2 <sup>4</sup> X | 0.971  | 3.037  | 171.796 | 81.69             | 160.70  | 3711.28 | -364.30612696 |                    |
|            | 3 <sup>4</sup> X |        |        |         | Dissociation      |         |         |               |                    |
| difference |                  | 0.007  | 0.005  | 11.603  | 294.25            | 27.07   | 118.9   | 0.0160452     |                    |
| POH        | 1 <sup>1</sup> X | 0.969  | 1.643  | 109.272 | 868.09            | 1112.09 | 3704.90 | -416.2345280  |                    |
|            | 2 <sup>1</sup> X | 0.967  | 1.657  | 111.738 | 820.45            | 982.15  | 3747.00 | -416.2187978  |                    |
|            | 3 <sup>1</sup> X | 0.963  | 1.664  | 117.814 | 674.08            | 847.20  | 3835.31 | -416.18754847 |                    |
|            | 1 <sup>3</sup> X | 0.962  | 1.671  | 111.470 | 773.38            | 1014.92 | 3848.80 | -416.2428944  |                    |



|                  |                  |                   |       |         |         |         |         |                |                                                                                      |                |
|------------------|------------------|-------------------|-------|---------|---------|---------|---------|----------------|--------------------------------------------------------------------------------------|----------------|
| GeOH             | 1 <sup>2</sup> X | 0.967             | 1.796 | 111.530 | 679.86  | 866.80  | 3748.90 | -2150.9455931  | Exp. <sup>26</sup><br>Ref. <sup>27</sup>                                             |                |
|                  |                  | 0.964             | 1.812 | 117.0   | 638.5   |         |         |                |                                                                                      |                |
|                  |                  | 0.951             | 1.769 | 116.59  | 716     | 808     | 4026    |                |                                                                                      |                |
|                  | 2 <sup>2</sup> X | 0.963             | 1.800 | 119.354 | 608.19  | 691.21  | 3824.90 | -2150.9291853  |                                                                                      |                |
|                  |                  | 3 <sup>2</sup> X  | 1.009 | 1.895   | 180.025 | 300.26  | 688.06  | 2700.01        |                                                                                      | -2150.80638820 |
|                  | 1 <sup>4</sup> X | 0.971             | 1.862 | 103.656 | 519.40  | 1033.53 | 3697.50 | -2150.8216064  |                                                                                      |                |
|                  | 2 <sup>4</sup> X | Non-convergence   |       |         |         |         |         |                |                                                                                      |                |
| 3 <sup>4</sup> X | Dissociation     |                   |       |         |         |         |         |                |                                                                                      |                |
| difference       |                  | 0.004             | 0.004 | 7.824   | 71.67   | 175.59  | 76.0    | 0.0164078      |                                                                                      |                |
| AsOH             | 1 <sup>1</sup> X | 0.969             | 1.782 | 107.740 | 706.21  | 1049.48 | 3718.40 | -2309.7373966  | Ref. <sup>28</sup>                                                                   |                |
|                  |                  | 2 <sup>1</sup> X  | 0.968 | 1.797   | 110.096 | 671.57  | 946.93  | 3743.70        |                                                                                      | -2309.7242295  |
|                  | 3 <sup>1</sup> X | 0.965             | 1.806 | 114.550 | 632.09  | 775.88  | 3791.33 | -2309.694079   |                                                                                      |                |
|                  | 1 <sup>3</sup> X | 0.966             | 1.824 | 108.672 | 611.29  | 979.05  | 3771.90 | -2309.7468493  |                                                                                      |                |
|                  | 2 <sup>3</sup> X | Dissociation      |       |         |         |         |         |                |                                                                                      |                |
|                  | 3 <sup>3</sup> X | Non-convergence   |       |         |         |         |         |                |                                                                                      |                |
| difference       |                  | /                 | /     | /       | /       | /       | /       | /              |                                                                                      |                |
| SeOH             | 1 <sup>2</sup> X | 0.968             | 1.804 | 105.321 | 662.77  | 1159.24 | 3729.10 | -2475.3875138  | Ref. <sup>28</sup>                                                                   |                |
|                  |                  | 0.966             | 1.766 | 105.900 |         |         |         |                |                                                                                      |                |
|                  | 2 <sup>2</sup> X | 0.969             | 1.839 | 105.698 | 600.38  | 1056.74 | 3731.40 | -2475.3698670  |                                                                                      |                |
|                  | 3 <sup>2</sup> X | Dissociation      |       |         |         |         |         |                |                                                                                      |                |
|                  | 1 <sup>4</sup> X | Dissociation      |       |         |         |         |         |                |                                                                                      |                |
|                  | 2 <sup>4</sup> X | 1.572             | 2.069 | 90.569  | 338.83  | 684.69  | 3047.98 | -2475.17412838 |                                                                                      |                |
|                  | 3 <sup>4</sup> X | Dissociation      |       |         |         |         |         |                |                                                                                      |                |
| difference       |                  | 0.001             | 0.035 | 0.377   | 62.39   | 102.5   | 2.3     | 0.0176468      |                                                                                      |                |
| RbOH             | 1 <sup>1</sup> X | 0.959             | 2.327 | 180.000 | 297.54  | 403.28  | 3789.26 | -99.27645737   | Ref. <sup>29</sup><br>Exp. <sup>30</sup><br>Ref. <sup>31</sup>                       |                |
|                  |                  | 0.957             | 2.301 | 180.000 | 309     | 354.4   | 3600    |                |                                                                                      |                |
|                  |                  | 0.965             | 2.305 | 180.000 |         |         |         |                |                                                                                      |                |
|                  |                  | 0.956             | 2.488 | 180.000 | 277     | 369     | 3902    |                |                                                                                      |                |
|                  | 2 <sup>1</sup> X | 0.973             | 3.217 | 180.000 | 68.82   | 427.22  | 3683.05 | -99.23207614   |                                                                                      |                |
|                  | 3 <sup>1</sup> X | 0.951             | 3.200 | 180.006 | 68.49   | 685.96  | 4036.86 | -99.20640565   |                                                                                      |                |
|                  | 1 <sup>3</sup> X | 0.952             | 3.164 | 132.343 | 87.12   | 159.16  | 4034.32 | -99.21061136   |                                                                                      |                |
|                  | 2 <sup>3</sup> X | virtual frequency |       |         |         |         |         |                |                                                                                      |                |
|                  | 3 <sup>3</sup> X | 0.953             | 2.965 | 122.825 | 138.11  | 317.87  | 3997.24 | -99.16917874   |                                                                                      |                |
| difference       |                  | 0.014             | 0.89  | 0       | 228.72  | 23.94   | 106.21  | 0.04438123     |                                                                                      |                |
| SrOH             | 1 <sup>2</sup> X | 0.933             | 2.140 | 180.000 | 366.20  | 536.08  | 4293.51 | -105.85742286  | Exp. <sup>32</sup><br>Exp. <sup>33</sup><br>Exp. <sup>33</sup><br>Exp. <sup>34</sup> |                |
|                  |                  | 0.922             | 2.111 | 180.000 | 361     | 528     |         |                |                                                                                      |                |
|                  |                  | 0.945             | 2.102 | 180.000 | 360     | 522     | 3700    |                |                                                                                      |                |
|                  | 2 <sup>2</sup> X | 0.932             | 2.115 | 180.000 | 389.41  | 550.56  | 4288.43 | -105.78827317  |                                                                                      |                |
|                  |                  | 0.946             | 2.088 | 180.000 |         |         |         |                |                                                                                      |                |
|                  |                  |                   |       |         | 544     |         |         |                |                                                                                      |                |
|                  | 3 <sup>2</sup> X | Non-convergence   |       |         |         |         |         |                |                                                                                      |                |
|                  | 1 <sup>4</sup> X | 0.955             | 2.763 | 111.858 | 168.29  | 383.31  | 3985.05 | -105.72724307  |                                                                                      |                |
|                  | 2 <sup>4</sup> X | virtual frequency |       |         |         |         |         |                |                                                                                      |                |

|            |                  |                 |                  |               |                 |         |         |                |                    |
|------------|------------------|-----------------|------------------|---------------|-----------------|---------|---------|----------------|--------------------|
|            | 3 <sup>4</sup> X |                 |                  |               | Dissociation    |         |         |                |                    |
| difference |                  | 0.001           | 0.025            | 0             | 23.21           | 14.48   | 5.08    | 0.06914969     |                    |
| InOH       | 1 <sup>1</sup> X | 0.940           | 2.038            | 129.331       | 472.22          | 589.54  | 4178.10 | -5815.7581042  |                    |
|            |                  | 0.911/<br>0.980 | 2.0167/<br>2.031 | 132/<br>127.7 |                 |         |         |                | Exp. <sup>35</sup> |
|            |                  |                 |                  | 132           | 378             | 542     |         |                | Exp. <sup>36</sup> |
|            | 2 <sup>1</sup> X | 0.964           | 2.056            | 121.096       | 519.42          | 576.95  | 3821.70 | -5815.7888674  |                    |
|            | 3 <sup>1</sup> X |                 |                  |               | Dissociation    |         |         |                |                    |
|            | 1 <sup>3</sup> X | 0.971           | 2.016            | 109.564       | 575.97          | 815.77  | 3717.00 | -5815.6557034  |                    |
|            |                  |                 |                  | 105           | 496             | 829     |         |                | Exp. <sup>36</sup> |
|            | 2 <sup>3</sup> X | 0.963           | 2.015            | 117.549       | 569.75          | 694.10  | 3833.60 | -5815.6586702  |                    |
|            | 3 <sup>3</sup> X |                 |                  |               | Dissociation    |         |         |                |                    |
| difference |                  | 0.024           | 0.018            | 8.235         | 47.2            | 12.59   | 356.4   | 0.0307632      |                    |
| SnOH       | 1 <sup>2</sup> X | 0.962           | 1.981            | 117.608       | 634.10          | 744.63  | 3840.40 | -6098.4930371  |                    |
|            | 2 <sup>2</sup> X | 0.940           | 2.000            | 126.927       | 524.31          | 629.73  | 4184.50 | -6098.4888271  |                    |
|            | 3 <sup>2</sup> X |                 |                  |               | Dissociation    |         |         |                |                    |
|            | 1 <sup>4</sup> X | 0.943           | 2.037            | 108.688       | 530.41          | 975.83  | 4138.50 | -6098.4001203  |                    |
|            | 2 <sup>4</sup> X |                 |                  |               | Dissociation    |         |         |                |                    |
|            | 3 <sup>4</sup> X |                 |                  |               | Dissociation    |         |         |                |                    |
| difference |                  | 0.022           | 0.019            | 9.319         | 109.79          | 114.90  | 344.1   | 0.0042100      |                    |
| SbOH       | 1 <sup>1</sup> X | 0.943           | 1.982            | 111.811       | 624.30          | 966.19  | 4137.40 | -6388.9727957  |                    |
|            | 2 <sup>1</sup> X | 0.943           | 1.989            | 114.637       | 607.69          | 865.10  | 4135.90 | -6388.9672654  |                    |
|            | 3 <sup>1</sup> X | 0.942           | 1.987            | 120.259       | 586.22          | 745.49  | 4155.72 | -6388.94491042 |                    |
|            | 1 <sup>3</sup> X | 0.942           | 2.014            | 112.280       | 552.93          | 908.86  | 4153.50 | -6388.9852139  |                    |
|            | 2 <sup>3</sup> X |                 |                  |               | Dissociation    |         |         |                |                    |
|            | 3 <sup>3</sup> X |                 |                  |               | Non-convergence |         |         |                |                    |
| difference |                  | /               | /                | /             | /               | /       | /       | /              |                    |
| TeOH       | 1 <sup>2</sup> X | 0.943           | 1.985            | 108.866       | 608.83          | 1087.87 | 4130.10 | -6687.2972143  |                    |
|            |                  | 0.9525          | 1.984            | 108           | 582             | 959     | 3655    |                | Ref. <sup>37</sup> |
|            | 2 <sup>2</sup> X | 0.944           | 2.001            | 110.772       | 577.78          | 977.33  | 4119.10 | -6687.2859932  |                    |
|            |                  |                 |                  | 113           |                 |         |         |                | Ref. <sup>37</sup> |
|            | 3 <sup>2</sup> X |                 |                  |               | Dissociation    |         |         |                |                    |
|            | 1 <sup>4</sup> X | 0.949           | 2.379            | 102.972       | 386.46          | 717.83  | 4059.50 | -6687.2052910  |                    |
|            | 2 <sup>4</sup> X |                 |                  |               | Dissociation    |         |         |                |                    |
|            | 3 <sup>4</sup> X |                 |                  |               | Dissociation    |         |         |                |                    |
| difference |                  | 0.001           | 0.016            | 1.906         | 31.05           | 110.54  | 11      | 0.0112211      |                    |
| BaOH       | 1 <sup>2</sup> X | 0.934           | 2.275            | 180.001       | 335.31          | 487.37  | 4267.44 | -100.61899699  |                    |
|            |                  | 0.923           | 2.201            |               | 341.6           | 492.4   |         |                | Exp. <sup>32</sup> |
|            |                  | 0.927           | 2.200            |               |                 |         |         |                | Exp. <sup>38</sup> |
|            | 2 <sup>2</sup> X | 0.934           | 2.259            | 180.000       | 373.23          | 493.78  | 4253.75 | -100.57513127  |                    |
|            | 3 <sup>2</sup> X |                 |                  |               | Non-convergence |         |         |                |                    |
|            | 1 <sup>4</sup> X | 0.956           | 2.953            | 112.026       | 157.65          | 355.53  | 3961.38 | -100.49023407  |                    |
|            | 2 <sup>4</sup> X | 0.962           | 2.953            | 154.142       | 137.94          | 486.21  | 3905.63 | -100.48812360  |                    |

|            |                  |       |       |         |                   |        |         |              |                    |
|------------|------------------|-------|-------|---------|-------------------|--------|---------|--------------|--------------------|
|            | 3 <sup>4</sup> X |       |       |         | Dissociation      |        |         |              |                    |
| difference |                  | 0     | 0.016 | 0.001   | 37.92             | 6.41   | 13.69   | 0.04386572   |                    |
| RaOH       | 1 <sup>2</sup> X | 0.934 | 2.362 | 179.999 | 386.84            | 457.00 | 4252.83 | -99.1881411  |                    |
|            |                  | 0.94  | 2.38  | 180.0   | 366               | 437    | 4243    |              | Ref. <sup>39</sup> |
|            | 2 <sup>2</sup> X | 0.934 | 2.338 | 179.999 | 396.95            | 476.20 | 4259.38 | -99.1327616  |                    |
|            |                  | 0.94  | 2.35  | 180.0   | 383               | 461    | 4248    |              | Ref. <sup>39</sup> |
|            | 3 <sup>2</sup> X |       |       |         | Non-convergence   |        |         |              |                    |
|            | 1 <sup>4</sup> X | 0.955 | 3.082 | 111.776 | 137.18            | 349.46 | 3968.80 | -99.0606957  |                    |
|            | 2 <sup>4</sup> X | 0.960 | 3.040 | 154.813 | 134.01            | 461.18 | 3921.30 | -99.0588003  |                    |
|            | 3 <sup>4</sup> X |       |       |         | Dissociation      |        |         |              |                    |
| difference |                  | 0.000 | 0.024 | 0.000   | 10.11             | 32.58  | 19.2    | 0.0553795    |                    |
| CsOH       | 1 <sup>1</sup> X | 0.960 | 2.446 | 180.000 | 280.88            | 304.43 | 3768.69 | -95.33595961 |                    |
|            |                  | 0.960 | 2.391 | 180.000 | 306               | 335.6  | 3600    |              | Ref. <sup>29</sup> |
|            |                  | 0.957 | 2.658 | 180.000 | 327               | 336    | 3887    |              | Ref. <sup>31</sup> |
|            |                  | 0.969 | 2.395 | 180.000 |                   |        |         |              | Exp. <sup>40</sup> |
|            |                  |       |       |         | 304.2             | 335.6  |         |              | Exp. <sup>41</sup> |
|            | 2 <sup>1</sup> X | 0.973 | 3.424 | 180.000 | 66.67             | 342.83 | 3682.63 | -95.28852669 |                    |
|            | 3 <sup>1</sup> X |       |       |         | Non-convergence   |        |         |              |                    |
|            | 1 <sup>3</sup> X |       |       |         | virtual frequency |        |         |              |                    |
|            | 2 <sup>3</sup> X | 0.973 | 3.384 | 180.000 | 72.62             | 175.22 | 3682.48 | -95.28901199 |                    |
|            | 3 <sup>3</sup> X |       |       |         | Dissociation      |        |         |              |                    |
| difference |                  | 0.013 | 0.978 | 0.000   | 214.21            | 38.4   | 86.06   | 0.04743292   |                    |
| FrOH       | 1 <sup>1</sup> X | 0.964 | 2.515 | 180.000 | 207.85            | 355.62 | 3717.24 | -94.31469397 |                    |
|            |                  | 0.958 | 2.500 | 180.000 | 313               | 351    | 3878    |              | Ref. <sup>31</sup> |
|            | 2 <sup>1</sup> X | 0.976 | 3.90  | 140.932 | 23.56             | 89.01  | 3606.11 | -94.28059596 |                    |
|            | 3 <sup>1</sup> X |       |       |         | virtual frequency |        |         |              |                    |
|            | 1 <sup>3</sup> X |       |       |         | virtual frequency |        |         |              |                    |
|            | 2 <sup>3</sup> X |       |       |         | virtual frequency |        |         |              |                    |
|            | 3 <sup>3</sup> X |       |       |         | virtual frequency |        |         |              |                    |
| difference |                  | 0.012 | 1.385 | 39.068  | 184.29            | 266.61 | 111.13  | 0.03409801   |                    |

Table S2 By using TD/DFT method implemented in Gaussian 16, the equilibrium structures and fundamental frequencies for the screened molecules (CaOH, SrOH, BaOH, RaOH, SOH, and SeOH) by MCSCF are calculated and list corresponding experimental and theoretical molecular parameters. For the H, O, S, Se and Ca, the structural parameters are calculated by B3LYP/cc-pVTZ. For Sr, B3LYP/cc-pVTZ-X2C is employed, while for Ba and Ra, B3LYP/def-SVP is



adopted, respectively. The blue part is the difference in bond lengths, bond angle, and vibrational frequencies between the lowest two electronic states of each molecule. The internuclear distances  $R_i$  are given in Å and the harmonic frequencies of normal mode  $\nu_i$  in  $\text{cm}^{-1}$ . The X represents the symmetry of state because all the calculations are carried out without symmetry.

|                  |                  | $R_{\text{O-H}}$ | $R_{\text{O-M}}$ | $\angle \text{M-O-H}$ | 2                 | 1       | 3       | energy        |                    |
|------------------|------------------|------------------|------------------|-----------------------|-------------------|---------|---------|---------------|--------------------|
| SOH              | 1 <sup>2</sup> X | 0.967            | 1.648            | 108.412               | 842.50            | 1179.27 | 3744.25 | -474.0258564  |                    |
|                  |                  | 0.963            | 1.647            | 107.4                 |                   |         |         |               | Ref. <sup>19</sup> |
|                  |                  | 0.963            | 1.645            | 106.4                 | 821               | 1202    | 3729    |               | Ref. <sup>20</sup> |
|                  | 2 <sup>2</sup> X | 0.966            | 1.674            | 109.907               | 771.41            | 1018.94 | 3780.70 | -474.0028341  |                    |
|                  | 3 <sup>2</sup> X |                  |                  |                       | Non-convergence   |         |         |               |                    |
|                  | 1 <sup>4</sup> X | 0.972            | 2.085            | 102.317               | 391.39            | 642.49  | 3702.73 | -473.9298231  |                    |
|                  | 2 <sup>4</sup> X | 1.298            | 1.768            | 91.984                | 661.95            | 968.59  | 2863.36 | -473.81618    |                    |
|                  | 3 <sup>4</sup> X |                  |                  |                       | Non-convergence   |         |         |               |                    |
| difference       |                  | 0.001            | 0.026            | 1.495                 | 71.09             | 160.33  | 36.45   | 0.0230223     |                    |
| CaOH             | 1 <sup>2</sup> X | 0.955            | 1.971            | 180.000               | 334.93            | 633.29  | 3935.25 | -753.5083407  |                    |
|                  |                  | 0.930            | 1.976            |                       | 339               | 606.1   |         |               | Exp. <sup>21</sup> |
|                  |                  | 0.922            | 1.985            |                       |                   |         |         |               | Exp. <sup>14</sup> |
|                  |                  | 9.333            | 2.0038           | 179.97                | 411/408           | 622     | 4276    |               | Ref. <sup>23</sup> |
|                  |                  | 0.9562           | 1.9746           | 180.00                |                   |         |         |               | Exp. <sup>24</sup> |
|                  | 2 <sup>2</sup> X | 0.955            | 1.963            | 180.000               | 305.67            | 612.94  | 3940.70 | -753.4342936  |                    |
|                  |                  | 0.932            | 1.956            |                       |                   |         |         |               | Exp. <sup>21</sup> |
|                  |                  | 0.9332           | 1.9769           | 179.9                 | 402/386           | 646     | 4279    |               | Ref. <sup>23</sup> |
|                  |                  | 0.9572           | 1.9532           | 180.00                |                   |         |         |               | Exp. <sup>24</sup> |
|                  | 3 <sup>2</sup> X | 0.955            | 1.963            | 180.000               | 306.08            | 612.51  | 3940.76 | -753.4342936  |                    |
|                  | 1 <sup>4</sup> X |                  |                  |                       | virtual frequency |         |         |               |                    |
|                  | 2 <sup>4</sup> X |                  |                  |                       | Non-convergence   |         |         |               |                    |
| 3 <sup>4</sup> X |                  |                  |                  | Non-convergence       |                   |         |         |               |                    |
| difference       |                  | 0                | 0.008            | 0                     | 29.26             | 20.35   | 5.45    | 0.0740471     |                    |
| SeOH             | 1 <sup>2</sup> X | 0.966            | 1.793            | 107.445               | 697.20            | 1104.43 | 3778.11 | -2477.446099  |                    |
|                  |                  | 0.966            | 1.766            | 105.900               |                   |         |         |               | Ref. <sup>28</sup> |
|                  | 2 <sup>2</sup> X | 0.966            | 1.817            | 108.786               | 649.68            | 983.89  | 3790.55 | -2477.428654  |                    |
|                  | 3 <sup>2</sup> X | 0.970            | 2.157            | 112.755               | 325.61            | 428.73  | 3721.85 | -2477.361816  |                    |
|                  | 1 <sup>4</sup> X |                  |                  |                       | Non-convergence   |         |         |               |                    |
|                  | 2 <sup>4</sup> X | 1.336            | 1.888            | 92.605                | 590.08            | 889.38  | 2756.13 | -2477.244162  |                    |
|                  | 3 <sup>4</sup> X |                  |                  |                       | Non-convergence   |         |         |               |                    |
| difference       |                  | 0                | 0.024            | 1.341                 | 47.52             | 120.54  | 12.44   | 0.017445      |                    |
| SrOH             | 1 <sup>2</sup> X | 0.955            | 2.112            | 175.974               | 314.06            | 532.55  | 3934.30 | -3180.5297843 |                    |
|                  |                  | 0.922            | 2.111            | 180.000               | 361               | 528     |         |               | Exp. <sup>32</sup> |
|                  |                  | 0.945            | 2.102            | 180.000               | 360               | 522     | 3700    |               | Exp. <sup>33</sup> |
|                  | 2 <sup>2</sup> X | 0.955            | 2.103            | 176.789               | 314.06            | 532.55  | 3934.30 | -3180.4659659 |                    |

|            |                  |        |       |         |                   |           |           |               |                    |
|------------|------------------|--------|-------|---------|-------------------|-----------|-----------|---------------|--------------------|
|            |                  | 0.946  | 2.088 | 180.000 |                   |           |           |               | Exp. <sup>33</sup> |
|            |                  |        |       |         |                   | 544       |           |               | Exp. <sup>34</sup> |
|            | 3 <sup>2</sup> X | 0.955  | 2.103 | 176.789 | 348.99            | 532.76    | 3934.35   | -3180.4659618 |                    |
|            | 1 <sup>4</sup> X |        |       |         | virtual frequency |           |           |               |                    |
|            | 2 <sup>4</sup> X |        |       |         | Non-convergence   |           |           |               |                    |
|            | 3 <sup>4</sup> X | 0.984  | 2.667 | 179.578 | 194.44            | 310.18    | 3388.23   | -3180.332551  |                    |
| difference |                  | 0      | 0.009 | 0.815   | 0                 | 0         | 0         | 0.0638184     |                    |
| BaOH       | 1 <sup>2</sup> X | 0.956  | 2.268 | 180.000 | 333.35            | 492.66    | 3910.18   | -101.3022346  |                    |
|            |                  | 0.923  | 2.201 |         | 341.6             | 492.4     |           |               | Exp. <sup>32</sup> |
|            |                  | 0.927  | 2.200 |         |                   |           |           |               | Exp. <sup>38</sup> |
|            | 2 <sup>2</sup> X | 0.956  | 2.294 | 180.000 | 288.51            | 465.38    | 3909.37   | -101.2566596  |                    |
|            | 3 <sup>2</sup> X | 0.956  | 2.294 | 180.000 | 288.82            | 464.93    | 3909.36   | -101.2566594  |                    |
|            | 1 <sup>4</sup> X |        |       |         | virtual frequency |           |           |               |                    |
|            | 2 <sup>4</sup> X |        |       |         | virtual frequency |           |           |               |                    |
|            | 3 <sup>4</sup> X |        |       |         | virtual frequency |           |           |               |                    |
| difference |                  | 0      | 0.026 | 0       | 44.84             | 27.28     | 0.81      | 0.045575      |                    |
| RaOH       | 1 <sup>2</sup> X | 0.957  | 2.305 | 180.000 | 347.17            | 464.28    | 3907.73   | -99.8862797   |                    |
|            |                  | 0.94   | 2.38  | 180.0   | 366               | 437       | 4243      |               | Ref. <sup>39</sup> |
|            | 2 <sup>2</sup> X | 0.956  | 2.308 | 180.000 | 318.43            | 459.14    | 3915.16   | -99.8213846   |                    |
|            |                  | 0.94   | 2.35  | 180.0   | 383               | 461       | 4248      |               | Ref. <sup>39</sup> |
|            | 3 <sup>2</sup> X | 0.956  | 2.309 | 180.000 | 318.29            | 458.90    | 3915.19   | -99.82138469  |                    |
|            | 1 <sup>4</sup> X |        |       |         | virtual frequency |           |           |               |                    |
|            | 2 <sup>4</sup> X |        |       |         | Non-convergence   |           |           |               |                    |
|            | 3 <sup>4</sup> X | 0.9818 | 2.976 | 180.000 | 135.1901          | 1840.7436 | 3430.6424 | -99.69457468  |                    |
| difference |                  | 0.001  | 0.003 | 0       | 28.74             | 5.14      | 7.43      | 0.0648951     |                    |

Table S3 Fitting parameters and root mean square errors (in cm<sup>-1</sup>) of the two-body terms for SOH and SeOH molecules.

|                 | OH              | OS              | HS              | OSe             | HSe             |
|-----------------|-----------------|-----------------|-----------------|-----------------|-----------------|
| w <sub>31</sub> | 1.06591068E+00  | 1.00574608E+00  | 1.28941611E+00  | 1.15047659E+00  | 8.54717421E-01  |
| w <sub>32</sub> | 2.21143445E+00  | 2.36936228E+00  | 1.28322974E+00  | 2.74767195E+00  | 2.04487456E+00  |
| w <sub>33</sub> | 1.07000000E+04  | 1.07000000E+04  | 1.07000000E+04  | 1.07000000E+04  | 1.07000000E+04  |
| w <sub>34</sub> | 2.13000000E+04  | 2.13000000E+04  | 2.13000000E+04  | 2.13000000E+04  | 2.13000000E+04  |
| w <sub>35</sub> | 2.21545177E+00  | -7.77371197E+02 | -7.77371197E+02 | -7.77371197E+02 | -7.77371197E+02 |
| b <sub>21</sub> | -5.71811388E-01 | 4.66510320E-05  | -2.49254323E+00 | -1.06317888E+00 | -1.88023664E+00 |
| b <sub>22</sub> | -7.70304074E-01 | -2.12340593E+00 | 1.36005536E+00  | -3.18955667E+00 | 1.80319024E-01  |
| b <sub>23</sub> | -1.39000000E+05 | -1.39000000E+05 | -1.39000000E+05 | -1.39000000E+05 | -1.39000000E+05 |
| b <sub>24</sub> | 1.07000000E+04  | 1.07000000E+04  | 1.07000000E+04  | 1.07000000E+04  | 1.07000000E+04  |
| b <sub>25</sub> | 1.53066123E-01  | 6.91500843E+03  | 6.91500843E+03  | 6.91500843E+03  | 6.91500843E+03  |

|           |                 |                 |                 |                 |                 |
|-----------|-----------------|-----------------|-----------------|-----------------|-----------------|
| $w_{211}$ | 1.95713733E+06  | 3.60000000E+05  | 3.60000000E+05  | 3.59988035E+05  | 3.60000000E+05  |
| $w_{221}$ | -3.32648081E+06 | -3.43000000E+06 | -3.43000000E+06 | -3.43001117E+06 | -3.43000000E+06 |
| $w_{231}$ | -1.17737612E+05 | 2.22000000E+04  | 2.22000000E+04  | 2.22053930E+04  | 2.22000000E+04  |
| $w_{241}$ | 6.84871222E+04  | 7.97000000E+04  | 7.97000000E+04  | 7.96946072E+04  | 7.97000000E+04  |
| $w_{251}$ | 1.46416448E+06  | 1.71000000E+06  | 1.71000000E+06  | 1.70999471E+06  | 1.71000000E+06  |
| $w_{212}$ | 3.63000000E+02  | 3.63000000E+02  | 3.63000000E+02  | 3.63000000E+02  | 3.63000000E+02  |
| $w_{222}$ | -8.83000000E+01 | -8.83000000E+01 | -8.83000000E+01 | -8.83000000E+01 | -8.83000000E+01 |
| $w_{232}$ | 3.39000000E+02  | 3.39000000E+02  | 3.39000000E+02  | 3.39000000E+02  | 3.39000000E+02  |
| $w_{242}$ | -3.87000000E+02 | -3.87000000E+02 | -3.87000000E+02 | -3.87000000E+02 | -3.87000000E+02 |
| $w_{252}$ | 1.76000000E+02  | 1.76000000E+02  | 1.76000000E+02  | 1.76000000E+02  | 1.76000000E+02  |
| $w_{213}$ | -2.15000000E+02 | -2.15000000E+02 | -4.46405211E+00 | -2.15000000E+02 | 5.91244302E-01  |
| $w_{223}$ | 1.21000000E+02  | 1.21000000E+02  | -2.46497333E-01 | 1.21000000E+02  | -7.21582735E+00 |
| $w_{233}$ | 6.09000000E+02  | 6.09000000E+02  | 5.51477515E+02  | 6.09000000E+02  | 5.48594146E+02  |
| $w_{243}$ | 2.16000000E+02  | 2.16000000E+02  | 2.73766667E+02  | 2.16000000E+02  | 2.76640773E+02  |
| $w_{253}$ | 5.52000000E+02  | 5.52000000E+02  | 6.09872377E+02  | 5.52000000E+02  | 6.12790058E+02  |
| $w_{214}$ | -8.64588828E-02 | -1.33582659E+00 | -8.28774067E-02 | -1.31219360E+00 | -4.20118859E-01 |
| $w_{224}$ | -2.80589749E-01 | 4.85828089E-01  | 8.37718861E+00  | 1.23138091E+00  | 6.92831183E+00  |
| $w_{234}$ | -2.61314134E+00 | -2.78522735E+00 | -3.07971188E-01 | 1.04355742E+00  | -6.56828289E-01 |
| $w_{244}$ | -3.86364216E+00 | -3.96550923E+00 | -6.37434225E+00 | -2.55025995E+00 | -6.10868815E+00 |
| $w_{254}$ | 2.47421861E+00  | 2.98003812E+00  | 4.47546797E-01  | 4.39551727E+00  | 8.50251489E-01  |
| $w_{215}$ | 8.22953580E+00  | 5.00425433E+01  | 1.95944107E-01  | 1.86209760E+01  | 1.28588870E+00  |
| $w_{225}$ | 1.35435209E+02  | 6.65205071E+02  | 5.70957924E+02  | 1.17032296E+03  | 5.71359212E+02  |
| $w_{235}$ | 1.02571829E+02  | 2.48085737E+02  | 2.10601378E+02  | 3.70297201E+02  | 2.10982772E+02  |
| $w_{245}$ | 3.39889419E+02  | 1.90664772E+02  | 2.28618845E+02  | 6.69954563E+01  | 2.28247063E+02  |
| $w_{255}$ | -2.25825705E+02 | -3.52482538E+02 | -3.20312874E+02 | -4.59539455E+02 | -3.20674569E+02 |
| $b_{11}$  | -2.80943919E+05 | -2.93000000E+05 | -2.93000000E+05 | -2.93005390E+05 | -2.93000000E+05 |
| $b_{12}$  | 2.12000000E+02  | 2.12000000E+02  | 2.12000000E+02  | 2.12000000E+02  | 2.12000000E+02  |
| $b_{13}$  | -3.94000000E+02 | -3.94000000E+02 | -3.37415679E+02 | -3.94000000E+02 | -3.34541340E+02 |
| $b_{14}$  | 2.08477430E+00  | 2.27035492E+00  | -3.90562152E-05 | 3.14744177E+00  | 4.46946859E-01  |
| $b_{15}$  | -1.59709070E+02 | -3.09697301E+02 | -2.71718613E+02 | -4.30631042E+02 | -2.72135799E+02 |
| $w_{11}$  | -2.42397439E+07 | -2.42521021E+07 | -2.40216785E+07 | -2.41961889E+07 | -2.38374814E+07 |
| $w_{12}$  | -4.07397430E+07 | -4.07505024E+07 | -4.05220676E+07 | -4.07097815E+07 | -4.03446903E+07 |
| $w_{13}$  | -4.59933523E+04 | -2.63714055E+05 | -8.64622576E+05 | -5.89301148E+05 | -2.53335992E+06 |
| $w_{14}$  | -1.18960173E+08 | -1.18937246E+08 | -1.19194641E+08 | -1.18658558E+08 | -1.19368457E+08 |
| $w_{15}$  | -2.84400943E+07 | -2.84497067E+07 | -2.82232051E+07 | -2.82605113E+07 | -2.79915772E+07 |
| $b_0$     | 2.48397436E+07  | 2.48515863E+07  | 2.46219755E+07  | 2.48058139E+07  | 2.44213675E+07  |
| RMS       | 2.478           | 14.930          | 5.125           | 12.757          | 15.830          |

Table S4 Fitting parameters and root mean square errors (in  $\text{cm}^{-1}$ ) of the three-body terms of the  $X^2A''$  and  $1^2A'$  states for SOH and SeOH molecules.

|  | SOH | SeOH |
|--|-----|------|
|--|-----|------|

|                          | X <sup>2</sup> A'' | I <sup>2</sup> A' | X <sup>2</sup> A'' | I <sup>2</sup> A' |
|--------------------------|--------------------|-------------------|--------------------|-------------------|
| <i>p</i> <sub>311</sub>  | -5.13000015E+04    | -5.13000000E+04   | -3.92387256E+04    | -4.54119603E+04   |
| <i>p</i> <sub>321</sub>  | -9.03000265E+03    | -9.03000000E+03   | -7.43863342E+03    | -8.14093313E+03   |
| <i>p</i> <sub>331</sub>  | -5.96000026E+04    | -5.96000000E+04   | -5.73850061E+04    | -5.83829127E+04   |
| <i>p</i> <sub>341</sub>  | 1.95459486E-01     | 2.41560916E-01    | 2.40454166E-01     | 2.42999039E-01    |
| <i>p</i> <sub>351</sub>  | -2.09244555E-02    | -3.91773924E-02   | -3.51879729E-02    | -4.08748796E-02   |
| <i>p</i> <sub>361</sub>  | 2.61671642E-04     | 1.78326436E-02    | 5.60913455E-03     | 1.53287211E-02    |
| <i>p</i> <sub>371</sub>  | 1.17655033E-01     | 4.48557432E-02    | 3.17124070E-02     | -4.74199164E-03   |
| <i>p</i> <sub>381</sub>  | -1.53545652E-01    | 1.51777740E-01    | 4.57883608E-01     | 3.42070857E-01    |
| <i>p</i> <sub>391</sub>  | 1.22109322E-01     | 4.51849634E-02    | -1.92560228E-01    | 1.77675892E-04    |
| <i>p</i> <sub>3101</sub> | 2.13462582E-01     | 1.65000400E+00    | 4.07111477E+05     | 4.07111477E+05    |
| <i>p</i> <sub>312</sub>  | -8.66580468E-02    | 3.33394749E-01    | 3.82330362E+05     | 3.82330362E+05    |
| <i>p</i> <sub>322</sub>  | -1.43045120E-01    | -1.73833935E+00   | -9.58973619E+05    | -9.58973619E+05   |
| <i>p</i> <sub>332</sub>  | 2.39087693E-01     | -1.47639703E-02   | 8.93789108E-02     | -3.57952786E-03   |
| <i>p</i> <sub>342</sub>  | 2.15163222E-01     | 1.80552802E-02    | 9.88243926E-03     | -4.57625239E-03   |
| <i>p</i> <sub>352</sub>  | -2.69838673E-01    | -3.37904008E-02   | -1.10706372E-01    | -7.25819206E-02   |
| <i>p</i> <sub>362</sub>  | -3.27506461E-01    | -2.72316219E-01   | -3.93904709E-01    | -3.03719897E-01   |
| <i>p</i> <sub>372</sub>  | -1.56509564E+00    | -5.08728564E-02   | -1.71164569E-01    | -5.46126337E-02   |
| <i>p</i> <sub>382</sub>  | 2.00710197E+00     | 6.33516889E-02    | 2.68573199E-01     | 1.01476413E-01    |
| <i>p</i> <sub>392</sub>  | -7.71233712E-02    | -5.06422352E-08   | -1.76097700E-01    | -8.02747396E-02   |
| <i>p</i> <sub>3102</sub> | -7.89962270E-03    | -4.40014689E-02   | -9.93604088E-03    | -2.74329287E-02   |
| <i>p</i> <sub>313</sub>  | 2.77287445E-02     | 5.19071635E-02    | 1.40494047E-01     | 1.31107988E-01    |
| <i>p</i> <sub>323</sub>  | 2.19411294E-01     | 2.43174172E-01    | 2.43309026E-01     | 2.42997723E-01    |
| <i>p</i> <sub>333</sub>  | -2.71830898E-02    | -3.43940729E-02   | -3.42934188E-02    | -3.58679621E-02   |
| <i>p</i> <sub>343</sub>  | 1.81683799E-02     | 1.35024912E-02    | 9.36785440E-03     | 1.15878828E-02    |
| <i>p</i> <sub>353</sub>  | 1.84986067E+01     | 1.85000000E+01    | 1.84992936E+01     | 1.84992936E+01    |
| <i>p</i> <sub>363</sub>  | 1.13981795E+01     | 1.14000000E+01    | 1.13994682E+01     | 1.13994682E+01    |
| <i>p</i> <sub>373</sub>  | -1.68173240E+00    | -1.68000000E+00   | -1.68038432E+00    | -1.68038432E+00   |
| <i>p</i> <sub>383</sub>  | -2.23865478E-01    | -2.22000000E-01   | -2.22424441E-01    | -2.22424441E-01   |
| <i>p</i> <sub>393</sub>  | -1.82014316E+01    | -1.82000000E+01   | -1.82004699E+01    | -1.82004699E+01   |
| <i>p</i> <sub>3103</sub> | -7.53184176E+00    | -7.53000000E+00   | -7.53073822E+00    | -7.53073822E+00   |
| <i>a</i> <sub>21</sub>   | 2.38999998E+05     | 2.39000000E+05    | 2.44901141E+05     | 2.40884758E+05    |
| <i>a</i> <sub>22</sub>   | -3.38130717E-01    | -3.59342578E-01   | -3.72991040E-01    | -3.61540728E-01   |
| <i>a</i> <sub>23</sub>   | -1.06906696E-01    | -1.31332871E+00   | -6.51995990E-01    | -1.65718190E+00   |
| <i>a</i> <sub>24</sub>   | -3.01925490E-01    | -4.32372445E+00   | -3.95443834E+05    | -3.95443834E+05   |
| <i>a</i> <sub>25</sub>   | -3.03686562E-01    | -3.34628856E-01   | -2.77412678E-01    | -8.02846103E-03   |
| <i>a</i> <sub>26</sub>   | 9.94503179E-02     | 4.21527554E-01    | 3.79456501E-01     | 3.98490426E-01    |
| <i>a</i> <sub>27</sub>   | -1.18745892E-01    | 1.58918897E-02    | 7.20339877E-02     | -2.95434510E-01   |
| <i>a</i> <sub>28</sub>   | -3.91855582E-01    | -3.61773995E-01   | -3.91715272E-01    | -3.57679121E-01   |
| <i>a</i> <sub>29</sub>   | 1.16997616E+02     | 1.17000000E+02    | 1.16999403E+02     | 1.16999403E+02    |
| <i>a</i> <sub>30</sub>   | -1.17175856E+00    | -1.17000000E+00   | -1.17069910E+00    | -1.17069910E+00   |
| <i>p</i> <sub>211</sub>  | -9.05216279E+00    | -9.05000000E+00   | -9.05040958E+00    | -9.05040958E+00   |
| <i>p</i> <sub>221</sub>  | -1.41002326E+02    | -1.41000000E+02   | -1.41000694E+02    | -1.41000694E+02   |

|                          |                 |                 |                 |                 |
|--------------------------|-----------------|-----------------|-----------------|-----------------|
| <i>p</i> <sub>231</sub>  | -1.47002670E+02 | -1.47000000E+02 | -1.47000570E+02 | -1.47000570E+02 |
| <i>p</i> <sub>241</sub>  | 1.24997306E+02  | 1.25000000E+02  | 1.24999384E+02  | 1.24999384E+02  |
| <i>p</i> <sub>251</sub>  | -1.29002142E+02 | -1.29000000E+02 | -1.29000676E+02 | -1.29000676E+02 |
| <i>p</i> <sub>261</sub>  | 6.45979926E+01  | 6.46000000E+01  | 6.45995207E+01  | 6.45995207E+01  |
| <i>p</i> <sub>271</sub>  | 1.30998475E+02  | 1.31000000E+02  | 1.30999297E+02  | 1.30999297E+02  |
| <i>p</i> <sub>281</sub>  | 6.51824524E+00  | 6.52000000E+00  | 6.51934260E+00  | 6.51934260E+00  |
| <i>p</i> <sub>291</sub>  | -1.74001749E+02 | -1.74000000E+02 | -1.74000753E+02 | -1.74000753E+02 |
| <i>p</i> <sub>2101</sub> | 1.26998063E+02  | 1.27000000E+02  | 1.26999503E+02  | 1.26999503E+02  |
| <i>p</i> <sub>212</sub>  | 1.03195072E-01  | 1.64000000E+01  | 1.63993623E+01  | 1.63993623E+01  |
| <i>p</i> <sub>222</sub>  | 1.05917895E+03  | -6.56000000E+01 | -6.56006402E+01 | -6.56006402E+01 |
| <i>p</i> <sub>232</sub>  | -3.30710535E+02 | 2.20000000E+01  | 2.19995933E+01  | 2.19995933E+01  |
| <i>p</i> <sub>242</sub>  | 6.24511949E+01  | 1.39000000E+02  | 1.38999351E+02  | 1.38999351E+02  |
| <i>p</i> <sub>252</sub>  | -1.24092047E+02 | -4.03000000E+02 | -4.03000599E+02 | -4.03000599E+02 |
| <i>p</i> <sub>262</sub>  | -3.79852711E-01 | 9.73000000E+01  | 9.72993258E+01  | 9.72993258E+01  |
| <i>p</i> <sub>272</sub>  | 8.64832775E+02  | 3.00000000E+02  | 2.99999572E+02  | 2.99999572E+02  |
| <i>p</i> <sub>282</sub>  | -4.07905866E+02 | 1.15000000E+02  | 1.14999339E+02  | 1.14999339E+02  |
| <i>p</i> <sub>292</sub>  | 5.03522682E+01  | 8.26000000E+01  | 8.25993157E+01  | 8.25993157E+01  |
| <i>p</i> <sub>2102</sub> | -4.95940901E+01 | -6.60000000E+01 | -6.60006240E+01 | -6.60006240E+01 |
| <i>p</i> <sub>213</sub>  | -2.25452199E+05 | -1.86175928E+03 | -1.06533508E+03 | -2.01954135E+03 |
| <i>p</i> <sub>223</sub>  | 4.78998532E+02  | -1.21401185E+03 | -1.25781650E+04 | -2.73034768E+03 |
| <i>p</i> <sub>233</sub>  | 1.30999760E+03  | 1.81764286E+02  | -4.84387478E+02 | -8.14081022E+01 |
| <i>p</i> <sub>243</sub>  | 2.32174857E+05  | 9.41258108E+02  | 3.09413471E+03  | 7.87130003E+02  |
| <i>p</i> <sub>253</sub>  | 2.08201286E+05  | 1.02561441E+03  | -2.30646810E+03 | 9.08870854E+02  |
| <i>p</i> <sub>263</sub>  | 1.54275873E+05  | 4.52216743E+02  | -7.60953945E+02 | 1.27839137E+03  |
| <i>p</i> <sub>273</sub>  | -9.61821637E+04 | -1.34770953E+02 | -7.79690908E+02 | 8.37921589E+03  |
| <i>p</i> <sub>283</sub>  | 9.02981447E+01  | 1.74250644E+03  | 1.12216799E+04  | -7.52804092E+01 |
| <i>p</i> <sub>293</sub>  | -2.12841277E+05 | -1.09065538E+02 | -8.52793680E+02 | 4.85885108E+01  |
| <i>p</i> <sub>2103</sub> | 1.73513895E+05  | 1.82324798E+02  | -1.20637159E+03 | 2.42289820E+01  |
| <i>p</i> <sub>214</sub>  | 1.28999791E+03  | 1.29000000E+03  | 1.28999925E+03  | 1.28999925E+03  |
| <i>p</i> <sub>224</sub>  | -2.0000225E+03  | -2.00000000E+03 | -2.0000076E+03  | -2.0000076E+03  |
| <i>p</i> <sub>234</sub>  | 9.29997473E+02  | 9.30000000E+02  | 9.29999552E+02  | 9.29999552E+02  |
| <i>p</i> <sub>244</sub>  | 2.20999848E+03  | 2.21000000E+03  | 2.20999925E+03  | 2.20999925E+03  |
| <i>p</i> <sub>254</sub>  | -2.55000231E+03 | -2.55000000E+03 | -2.55000048E+03 | -2.55000048E+03 |
| <i>p</i> <sub>264</sub>  | 1.36999784E+03  | 1.37000000E+03  | 1.36999939E+03  | 1.36999939E+03  |
| <i>p</i> <sub>274</sub>  | 2.98999791E+03  | 2.99000000E+03  | 2.98999939E+03  | 2.98999939E+03  |
| <i>p</i> <sub>284</sub>  | -2.34000243E+03 | -2.34000000E+03 | -2.34000071E+03 | -2.34000071E+03 |
| <i>p</i> <sub>294</sub>  | -1.31000268E+03 | -1.31000000E+03 | -1.31000041E+03 | -1.31000041E+03 |
| <i>p</i> <sub>2104</sub> | 3.04999858E+03  | 3.05000000E+03  | 3.04999952E+03  | 3.04999952E+03  |
| <i>p</i> <sub>215</sub>  | 5.62004630E+01  | 5.26968962E+02  | 5.28347806E+02  | 5.26264892E+02  |
| <i>p</i> <sub>225</sub>  | 3.13201978E+03  | 5.33400207E+02  | 5.24133397E+02  | 5.01818095E+02  |
| <i>p</i> <sub>235</sub>  | 1.96301594E+02  | 1.24811501E+01  | 3.27665190E+01  | 2.22660312E+01  |
| <i>p</i> <sub>245</sub>  | -2.18413251E+02 | 1.84896523E+03  | 1.84761080E+03  | 1.84969710E+03  |
| <i>p</i> <sub>255</sub>  | 2.96961808E+00  | -1.71670618E+02 | -1.65378673E+02 | -1.83294599E+02 |

|                          |                 |                 |                 |                 |
|--------------------------|-----------------|-----------------|-----------------|-----------------|
| <i>p</i> <sub>265</sub>  | -7.20905628E-02 | 7.36636468E+01  | 7.11721584E+01  | 7.33917212E+01  |
| <i>p</i> <sub>275</sub>  | -1.33924327E+02 | -2.71612267E+02 | -1.95502261E+02 | -1.77579540E+02 |
| <i>p</i> <sub>285</sub>  | -2.74397953E+03 | -4.54517368E+02 | -4.95231402E+02 | -4.69212039E+02 |
| <i>p</i> <sub>295</sub>  | -5.51916623E+01 | 4.16902119E+02  | 4.18285710E+02  | 4.16199364E+02  |
| <i>p</i> <sub>2105</sub> | 2.09309631E+01  | -4.47292552E+02 | -4.48676008E+02 | -4.46589677E+02 |
| <i>p</i> <sub>216</sub>  | 1.01999984E+04  | 1.02000000E+04  | 1.01999994E+04  | 1.01999994E+04  |
| <i>p</i> <sub>226</sub>  | -6.91000224E+03 | -6.91000000E+03 | -6.91000048E+03 | -6.91000048E+03 |
| <i>p</i> <sub>236</sub>  | -3.46000017E+04 | -3.46000000E+04 | -3.46000006E+04 | -3.46000006E+04 |
| <i>p</i> <sub>246</sub>  | 2.34999977E+04  | 2.35000000E+04  | 2.34999996E+04  | 2.34999996E+04  |
| <i>p</i> <sub>256</sub>  | -7.24000257E+03 | -7.24000000E+03 | -7.24000074E+03 | -7.24000074E+03 |
| <i>p</i> <sub>266</sub>  | -1.07000021E+04 | -1.07000000E+04 | -1.07000007E+04 | -1.07000007E+04 |
| <i>p</i> <sub>276</sub>  | -7.24000181E+03 | -7.24000000E+03 | -7.24000070E+03 | -7.24000070E+03 |
| <i>p</i> <sub>286</sub>  | -7.80000258E+03 | -7.80000000E+03 | -7.80000043E+03 | -7.80000043E+03 |
| <i>p</i> <sub>296</sub>  | -6.27000261E+03 | -6.27000000E+03 | -6.27000042E+03 | -6.27000042E+03 |
| <i>p</i> <sub>2106</sub> | 8.49999983E+04  | 8.50000000E+04  | 8.49999995E+04  | 8.49999995E+04  |
| <i>p</i> <sub>217</sub>  | 7.28719030E+05  | 5.57427587E+03  | 5.57427520E+03  | 5.57427520E+03  |
| <i>p</i> <sub>227</sub>  | -6.69552708E+06 | 1.99000000E+02  | 1.98999523E+02  | 1.98999523E+02  |
| <i>p</i> <sub>237</sub>  | -1.83151856E+06 | -5.31631035E+02 | -5.31631579E+02 | -5.31631579E+02 |
| <i>p</i> <sub>247</sub>  | 7.95741338E+05  | 2.42449500E+03  | 2.42449454E+03  | 2.42449454E+03  |
| <i>p</i> <sub>257</sub>  | -1.87459949E+06 | 1.32811596E+03  | 1.32811554E+03  | 1.32811554E+03  |
| <i>p</i> <sub>267</sub>  | -1.69279576E+06 | 5.85282446E+02  | 5.85281835E+02  | 5.85281835E+02  |
| <i>p</i> <sub>277</sub>  | 3.01497081E+06  | -7.21000000E+01 | -7.21007502E+01 | -7.21007502E+01 |
| <i>p</i> <sub>287</sub>  | -1.21892719E+07 | 5.81000000E+01  | 5.80995769E+01  | 5.80995769E+01  |
| <i>p</i> <sub>297</sub>  | -8.25293976E+05 | 2.91000000E+01  | 2.90995811E+01  | 2.90995811E+01  |
| <i>p</i> <sub>2107</sub> | 2.20331198E+04  | -4.88147365E+03 | -4.88147435E+03 | -4.88147435E+03 |
| <i>p</i> <sub>218</sub>  | -1.18020823E+01 | -1.18000000E+01 | -1.18007285E+01 | -1.18007285E+01 |
| <i>p</i> <sub>228</sub>  | 3.45998064E+02  | 3.46000000E+02  | 3.45999570E+02  | 3.45999570E+02  |
| <i>p</i> <sub>238</sub>  | 4.82983377E+01  | 4.83000000E+01  | 4.82993736E+01  | 4.82993736E+01  |
| <i>p</i> <sub>248</sub>  | 4.37923782E+05  | -7.44000000E+01 | -7.44007480E+01 | -7.44007480E+01 |
| <i>p</i> <sub>258</sub>  | 4.39998169E+02  | 4.40000000E+02  | 4.39999410E+02  | 4.39999410E+02  |
| <i>p</i> <sub>268</sub>  | 3.74455196E+05  | -8.38000000E+01 | -8.38004916E+01 | -8.38004916E+01 |
| <i>p</i> <sub>278</sub>  | 8.14982376E+01  | 8.15000000E+01  | 8.14992592E+01  | 8.14992592E+01  |
| <i>p</i> <sub>288</sub>  | -2.54613001E+05 | -3.83000000E+02 | -3.83000449E+02 | -3.83000449E+02 |
| <i>p</i> <sub>298</sub>  | 1.29986371E+01  | 1.30000000E+01  | 1.29994920E+01  | 1.29994920E+01  |
| <i>p</i> <sub>2108</sub> | 4.84860982E+05  | 6.86000000E+01  | 6.85994985E+01  | 6.85994985E+01  |
| <i>p</i> <sub>219</sub>  | -2.78542487E-02 | -1.30431723E-01 | 1.27701103E-01  | 3.17128608E-02  |
| <i>p</i> <sub>229</sub>  | 1.73593721E+02  | 5.68536126E+01  | -1.00839664E+02 | 1.04222688E+01  |
| <i>p</i> <sub>239</sub>  | 8.61256126E+01  | 1.13203995E+01  | -2.36987651E+00 | -2.04356476E+00 |
| <i>p</i> <sub>249</sub>  | -2.19538327E+01 | -2.81679738E+01 | -2.93386395E+01 | -2.20492064E+01 |
| <i>p</i> <sub>259</sub>  | 4.85803517E+01  | 9.30368064E+01  | 1.52631104E+02  | 3.36020386E+01  |
| <i>p</i> <sub>269</sub>  | -2.98625199E-01 | -3.48842625E+01 | -9.85126348E+00 | -3.00768619E+01 |
| <i>p</i> <sub>279</sub>  | 1.26837587E+02  | 9.98669234E+01  | 1.25153623E+02  | 4.84806612E+01  |
| <i>p</i> <sub>289</sub>  | -1.98062741E+02 | -9.39485828E+01 | 1.27332515E+02  | -3.08033763E+01 |

|                           |                 |                 |                 |                 |
|---------------------------|-----------------|-----------------|-----------------|-----------------|
| <i>p</i> <sub>299</sub>   | 1.52902950E+01  | 1.42556847E+01  | 1.57903299E+01  | 8.25783251E+00  |
| <i>p</i> <sub>2109</sub>  | 6.01915374E+00  | 6.99693573E+00  | 5.87029200E+00  | 1.29951406E+01  |
| <i>p</i> <sub>2110</sub>  | 2.19367752E-02  | 1.68302259E-01  | 2.96330277E-01  | 1.48301241E-01  |
| <i>p</i> <sub>2210</sub>  | 8.18165181E+01  | 9.92451539E+00  | 7.30020963E+00  | 4.87515329E+00  |
| <i>p</i> <sub>2310</sub>  | -9.11825669E+01 | -1.29057077E+01 | -1.15183131E+01 | -1.47021438E+01 |
| <i>p</i> <sub>2410</sub>  | 9.46042279E+00  | 1.70370467E+01  | 1.64610386E+01  | 1.72850669E+01  |
| <i>p</i> <sub>2510</sub>  | -5.47545742E+01 | -3.43409516E+01 | -4.22683588E+01 | -3.64929247E+01 |
| <i>p</i> <sub>2610</sub>  | -1.14619294E+00 | -3.60853861E+00 | -2.13023214E+01 | -6.46013481E+00 |
| <i>p</i> <sub>2710</sub>  | -4.68143496E+01 | -1.44256434E+01 | 2.41166375E-05  | -1.14977181E+01 |
| <i>p</i> <sub>2810</sub>  | 1.36446992E+01  | -1.20998250E+01 | -2.67208636E+01 | -1.90040054E+01 |
| <i>p</i> <sub>2910</sub>  | 1.44097266E+00  | -1.05337750E+00 | -4.83242286E-01 | -1.31387465E+00 |
| <i>p</i> <sub>21010</sub> | -1.55827979E+00 | 7.99086904E-01  | 2.81721672E-01  | 1.06161788E+00  |
| <i>p</i> <sub>2111</sub>  | 7.12187932E+06  | 2.68000000E+06  | 2.68000000E+06  | 2.68000000E+06  |
| <i>p</i> <sub>2211</sub>  | -1.26123623E+07 | -1.65000000E+07 | -1.65000000E+07 | -1.65000000E+07 |
| <i>p</i> <sub>2311</sub>  | -2.37575409E+07 | -2.07000000E+07 | -2.07000000E+07 | -2.07000000E+07 |
| <i>p</i> <sub>2411</sub>  | -6.68056101E+05 | -2.96000000E+05 | -2.96000001E+05 | -2.96000001E+05 |
| <i>p</i> <sub>2511</sub>  | -4.51594565E+06 | -1.43000000E+07 | -1.43000000E+07 | -1.43000000E+07 |
| <i>p</i> <sub>2611</sub>  | -3.91080675E+06 | 1.70000000E+05  | 1.69999999E+05  | 1.69999999E+05  |
| <i>p</i> <sub>2711</sub>  | 1.88419836E+07  | -1.13000000E+06 | -1.13000000E+06 | -1.13000000E+06 |
| <i>p</i> <sub>2811</sub>  | 2.33156156E+07  | -1.81000000E+07 | -1.81000000E+07 | -1.81000000E+07 |
| <i>p</i> <sub>2911</sub>  | 1.24225079E+07  | 1.71000000E+05  | 1.70999999E+05  | 1.70999999E+05  |
| <i>p</i> <sub>21011</sub> | -9.08706607E+06 | -1.43000000E+05 | -1.43000001E+05 | -1.43000001E+05 |
| <i>p</i> <sub>2112</sub>  | -1.62302854E-02 | -1.59859337E-01 | -2.95498785E-01 | -1.01043214E-01 |
| <i>p</i> <sub>2212</sub>  | 7.64645470E+01  | 6.20645117E+01  | 8.86669925E+01  | 7.03608653E+01  |
| <i>p</i> <sub>2312</sub>  | 7.36021947E+01  | 1.28258481E+01  | 1.04720707E+01  | 1.23482733E+01  |
| <i>p</i> <sub>2412</sub>  | -1.22297144E+01 | -1.96903235E+01 | -1.94109603E+01 | -1.95179336E+01 |
| <i>p</i> <sub>2512</sub>  | 4.33845125E+01  | 4.83784066E+01  | 6.41039084E+01  | 4.50850961E+01  |
| <i>p</i> <sub>2612</sub>  | 1.06916789E+00  | -7.05324315E+00 | 1.69812497E+01  | -5.69021186E+00 |
| <i>p</i> <sub>2712</sub>  | 7.23596767E+01  | 3.20927775E+01  | 2.38707564E+01  | 2.52688501E+01  |
| <i>p</i> <sub>2812</sub>  | -1.20968979E+02 | -7.05673472E+01 | -6.46822058E+01 | -6.66068403E+01 |
| <i>p</i> <sub>2912</sub>  | 3.74079635E+00  | 4.03630747E+00  | 3.76142021E+00  | 3.86896942E+00  |
| <i>p</i> <sub>21012</sub> | 1.28664736E+00  | 9.30456689E-01  | 1.20666828E+00  | 1.09749242E+00  |
| <i>p</i> <sub>2113</sub>  | 1.18998016E+02  | 1.48643926E+02  | 1.47275435E+02  | 1.48349423E+02  |
| <i>p</i> <sub>2213</sub>  | 2.01998157E+02  | -5.84517071E+02 | -5.20534418E+02 | -5.64628224E+02 |
| <i>p</i> <sub>2313</sub>  | 1.58351072E-01  | -1.16164092E+01 | -3.31324407E+01 | -2.22876908E+01 |
| <i>p</i> <sub>2413</sub>  | -4.77022120E+01 | 6.27998798E+01  | 6.41032600E+01  | 6.30343142E+01  |
| <i>p</i> <sub>2513</sub>  | 5.73976614E+01  | 2.00931060E+02  | 2.02996662E+02  | 2.01708483E+02  |
| <i>p</i> <sub>2613</sub>  | -5.04215981E+00 | -8.06136709E+01 | -7.25205432E+01 | -7.63812283E+01 |
| <i>p</i> <sub>2713</sub>  | 1.15998290E+02  | 3.02342147E+02  | 2.23731558E+02  | 1.91856011E+02  |
| <i>p</i> <sub>2813</sub>  | -1.61001882E+02 | 4.99254980E+02  | 4.97132284E+02  | 5.33056867E+02  |
| <i>p</i> <sub>2913</sub>  | 5.77985976E+01  | 8.74222235E+01  | 8.60613407E+01  | 8.71348413E+01  |
| <i>p</i> <sub>21013</sub> | 3.36837173E+06  | 2.08165234E+02  | 2.09526855E+02  | 2.08453036E+02  |
| <i>p</i> <sub>2114</sub>  | 8.02984474E+01  | 8.03000000E+01  | 8.02993217E+01  | 8.02993217E+01  |

|             |                 |                 |                 |                 |
|-------------|-----------------|-----------------|-----------------|-----------------|
| $p_{2214}$  | 5.01983161E+01  | 5.02000000E+01  | 5.01994377E+01  | 5.01994377E+01  |
| $p_{2314}$  | 2.68983149E+01  | 2.69000000E+01  | 2.68995063E+01  | 2.68995063E+01  |
| $p_{2414}$  | 1.24616137E-01  | 1.26000000E-01  | 1.25397896E-01  | 1.25397896E-01  |
| $p_{2514}$  | 8.68985394E+01  | 8.69000000E+01  | 8.68993755E+01  | 8.68993755E+01  |
| $p_{2614}$  | 6.34985638E+01  | 6.35000000E+01  | 6.34995342E+01  | 6.34995342E+01  |
| $p_{2714}$  | -3.72020552E+01 | -3.72000000E+01 | -3.72005947E+01 | -3.72005947E+01 |
| $p_{2814}$  | 4.23981273E+01  | 4.24000000E+01  | 4.23994693E+01  | 4.23994693E+01  |
| $p_{2914}$  | 2.67639491E-01  | 2.70000000E-01  | 2.69359614E-01  | 2.69359614E-01  |
| $p_{21014}$ | -8.32021433E+01 | -8.32000000E+01 | -8.32007422E+01 | -8.32007422E+01 |
| $p_{2115}$  | 5.79999983E+04  | 5.80000000E+04  | 5.79999995E+04  | 5.79999995E+04  |
| $p_{2215}$  | 6.76998557E+02  | 6.77000000E+02  | 6.76999405E+02  | 6.76999405E+02  |
| $p_{2315}$  | -9.21001733E+02 | -9.21000000E+02 | -9.21000474E+02 | -9.21000474E+02 |
| $p_{2415}$  | -3.21001698E+02 | -3.21000000E+02 | -3.21000527E+02 | -3.21000527E+02 |
| $p_{2515}$  | -9.99000223E+03 | -9.99000000E+03 | -9.99000074E+03 | -9.99000074E+03 |
| $p_{2615}$  | -7.09000183E+03 | -7.09000000E+03 | -7.09000048E+03 | -7.09000048E+03 |
| $p_{2715}$  | -3.73025275E+01 | -3.73000000E+01 | -3.73005605E+01 | -3.73005605E+01 |
| $p_{2815}$  | -1.35000145E+03 | -1.35000000E+03 | -1.35000057E+03 | -1.35000057E+03 |
| $p_{2915}$  | 3.71997371E+02  | 3.72000000E+02  | 3.71999259E+02  | 3.71999259E+02  |
| $p_{21015}$ | 4.21999978E+04  | 4.22000000E+04  | 4.21999993E+04  | 4.21999993E+04  |
| $a_{11}$    | -2.00002079E+02 | -2.00000000E+02 | -2.00000551E+02 | -2.00000551E+02 |
| $a_{12}$    | 1.50233558E+02  | 8.16000000E+01  | 8.15995124E+01  | 8.15995124E+01  |
| $a_{13}$    | -2.09494079E+05 | -1.13256173E+02 | 2.92692794E+03  | 4.40831145E+01  |
| $a_{14}$    | -1.31000167E+03 | -1.31000000E+03 | -1.31000046E+03 | -1.31000046E+03 |
| $a_{15}$    | -5.38087189E+01 | 4.15616894E+02  | 4.16999548E+02  | 4.14913515E+02  |
| $a_{16}$    | -6.29000244E+03 | -6.29000000E+03 | -6.29000068E+03 | -6.29000068E+03 |
| $a_{17}$    | 1.54643201E+05  | 1.61000000E-01  | 1.60588192E-01  | 1.60588192E-01  |
| $a_{18}$    | 1.40981227E+01  | 1.41000000E+01  | 1.40994733E+01  | 1.40994733E+01  |
| $a_{19}$    | 5.04855538E+00  | 3.85103664E+00  | 6.36042462E+00  | -2.26809967E+00 |
| $a_{110}$   | -8.81544446E-04 | -2.42170622E+00 | -1.85909286E+00 | -2.68296963E+00 |
| $a_{111}$   | -5.59928116E+06 | 1.71000000E+05  | 1.70999999E+05  | 1.70999999E+05  |
| $a_{112}$   | 2.86439498E+00  | 3.16618309E+00  | 2.89437136E+00  | 2.99925644E+00  |
| $a_{113}$   | 5.78980555E+01  | 8.75618496E+01  | 8.61995087E+01  | 8.72736666E+01  |
| $a_{114}$   | 3.11997810E+02  | 3.12000000E+02  | 3.11999569E+02  | 3.11999569E+02  |
| $a_{115}$   | 5.93997544E+02  | 5.94000000E+02  | 5.93999601E+02  | 5.93999601E+02  |
| $p_{11}$    | -1.59183382E+03 | -2.96653904E+03 | -1.58736061E+03 | -3.16996900E+03 |
| $p_{12}$    | 6.41659752E+02  | 3.56254595E+03  | 2.17350501E+03  | 3.75621884E+03  |
| $p_{13}$    | -3.33516947E+02 | -6.39194578E+02 | -3.35463393E+00 | -9.77425317E+02 |
| $p_{14}$    | 5.35210000E+02  | -9.40935198E+02 | 5.65686845E+02  | -1.17177588E+03 |
| $p_{15}$    | -6.74001926E+02 | 1.84959300E+04  | 1.76199409E+04  | 1.65108201E+04  |
| $p_{16}$    | -1.90273613E+02 | -1.77211040E+03 | -3.01392393E+02 | -1.96421196E+03 |
| $p_{17}$    | 4.00098985E-01  | -9.57823769E+03 | -8.81983319E+03 | -8.75337145E+03 |
| $p_{18}$    | 1.34685794E+03  | -1.34829295E+02 | 1.20952637E+03  | -3.10041470E+02 |
| $p_{19}$    | 1.10072705E+03  | -4.12726207E+03 | -3.45816420E+02 | -3.79211370E+02 |



|           |                 |                 |                 |                 |
|-----------|-----------------|-----------------|-----------------|-----------------|
| $p_{110}$ | 4.27099347E+03  | 1.36116279E+04  | 1.39105947E+04  | 1.58084468E+04  |
| $p_{111}$ | -3.98485954E-01 | 1.82665122E+03  | 7.39075116E+01  | 2.04192763E+03  |
| $p_{112}$ | 4.26139359E+03  | 1.77780623E+04  | 2.94878426E+04  | 1.73030534E+04  |
| $p_{113}$ | 2.64767073E+03  | 1.62163022E+04  | 1.97435829E+04  | 1.88592962E+04  |
| $p_{114}$ | 4.02595213E+02  | 1.72789961E+03  | 3.33380766E+02  | 1.92054081E+03  |
| $p_{115}$ | -9.02542655E-02 | -9.55917140E+03 | -8.80054443E+03 | -8.73390162E+03 |
| $a_0$     | 1.72234080E+03  | 3.17784139E+03  | 1.78139394E+03  | 3.36982493E+03  |
| RMS       | 336.205         | 260.777         | 183.486         | 250.742         |

## References

- 1 P. R. Bunker, P. Jensen, A. Karpfen, and H. Lischka, *J. Mol. Spectrosc.*, 1989, **135**, 89-104.
- 2 D. McNaughton, L. M. Tack, B. Kleibömer, and P. D. Godfrey, *Struct. Chem.*, 1994, **5**, 313-319.
- 3 I. F. Chi Mbapeh, S. C. Galleguillos Kempf, and P. Jensen, *J. Phys. Chem. A*, 2015, **119**, 10112-10123.
- 4 Y. G. Abashkin and A. I. Dement'ev, *J. Struct. Chem.*, 1982, **23**, 152-154.
- 5 J. Koput, *J. Comput. Chem.*, 2017, **38**, 37-43.
- 6 Y. Yamaguchi, B. J. DeLeeuw, G. Vacek, C. A. Richards, and H. F. Schaefer III, *J. Chem. Phys.*, 1994, **101**, 3006-3017.
- 7 J. L. Gole and H. H. Michels, *J. Chem. Phys.*, 1995, **103**, 7844-7850.
- 8 J. M. Bowman, J. S. Bittman, and L. B. Harding, *J. Chem. Phys.*, 1986, **85**, 911-921.
- 9 W. J. Morgan and R. C. Fortenberry, *Spectrochim. Acta Part A*, 2015, **135**, 965-972.
- 10 U. Bozkaya, J. M. Turney, Y. Yamaguchi, and H. F. Schaefer III, *J. Chem. Phys.*, 2012, **136**, 164303.
- 11 P. R. Bunker, I. P. Hamilton, and P. Jensen, *J. Mol. Spectrosc.*, 1992, **155**, 44-54.
- 12 G. J. Vazquez, S. D. Peyerimhoff, and R. J. Buenker, *Chem. Phys.*, 1985, **99**, 239-257.

- 13 P. Kuijpers, T. Törring, and A. Dymanus, *Chem. Phys.*, 1976, **15**, 457-461.
- 14 B. P. Nuccio, A. J. Apponi, and L. M. Ziurys, *J. Chem. Phys.*, 1995, **103**, 9193-9199.
- 15 J. Koput, S. Carter, K. A. Peterson, and G. Theodorakopoulos, *J. Chem. Phys.*, 2002, **117**, 1529-1535.
- 16 C. Sikorska and P. Skurski, *Chem. Phys. Lett.*, 2009, **477**, 259-265.
- 17 J. S. Pilgrim, D. L. Robbins, and M. A. Duncan, *Chem. Phys. Lett.*, 1993, **202**, 203-208.
- 18 M. C. McCarthy, F. Tamassia, D. E. Woon, and P. Thaddeus, *J. Chem. Phys.*, 2008, **129**, 184301.
- 19 C. Wilson and D. M. Hirst, *J. Chem. Soc., Faraday Trans.*, 1994, **90**, 3051-3059.
- 20 S. S. Xantheas and T. H. Dunning, *J. Phys. Chem.*, 1993, **97**, 18-19.
- 21 R. C. Hilborn, Z. Qingshi, and D. O. Harris, *J. Mol. Spectrosc.*, 1983, **97**, 73-91.
- 22 T. Kuijpers, T. Törring, A. Dymanus, *Z. Naturforsch. A*, 1975, **30**, 1256-1260.
- 23 T. A. Isaev and R. Berger, *Phys. Rev. Lett.*, 2016, **116**, 063006.
- 24 M. Li and J. A. Coxon, *J. Chem. Phys.*, 1996, **104**, 4961-4977.
- 25 V. A. Macrae and A. J. Downs, *Phys. Chem. Chem. Phys.*, 2004, **6**, 4571-4578.
- 26 Y. -L. Teng, L. Jiang, S. Han, and Q. Xu, *J. Phys. Chem. A*, 2007, **111**, 6225-6231.
- 27 Y. Yamaguchi and H. F. Schaefer III, *J. Chem. Phys.*, 1996, **104**, 9841-9847.
- 28 R. B. Viana, *Mol. Phys.*, 2017, **115**, 1004-1013.
- 29 D. R. Lide Jr. and C. Matsumura, *J. Chem. Phys.*, 1969, **50**, 3080-3086.
- 30 C. Matsumura and D. R. Lide Jr., *J. Chem. Phys.*, 1969, **50**, 71-75.
- 31 E. P. F. Lee, and T. G. Wrigth, *J. Phys. Chem. A*, 2003, **107**, 5233-5240.
- 32 S. Kinsey-Nielsen, C. R. Brazier, and P. F. Bernath, *J. Chem. Phys.*, 1986, **84**, 698-708.

- 33 J. Nakagawa, R. F. Wormsbecher, and D. O. Harris, *J. Mol. Spectrosc.*, 1983, **97**, 37-64.
- 34 C. R. Brazier and P. F. Bernath, *J. Mol. Spectrosc.*, 1985, **114**, 163-173.
- 35 N. M. Lakin, T. D. Varberg, and J. M. Brown, *J. Mol. Spectrosc.*, 1997, **183**, 34-41.
- 36 N. M. Lakin, J. M. Brown, I. R. Beattie, and P. J. Jones, *J. Chem. Phys.*, 1994, **100**, 8546-8549.
- 37 V. Rai-Constapel, H.-P. Liebermann, R. J. Buenker, M. Honigmann, and P. Jensen, *J. Mol. Spectrosc.*, 2007, **244**, 102-108.
- 38 M. A. Anderson, M. D. Allen, W. L. Barcaly, and L. M. Ziurys, *Chem. Phys. Lett.*, 1993, **205**, 415-422.
- 39 T. A. Isaev, A. V. Zaitsevskii, and E. Eliav, *J. Phys. B-At. Mol. Opt.*, 2017, **50**, 225101.
- 40 D. R. Lide Jr. and R. L. Kuczkowski, *J. Chem. Phys.*, 1967, **46**, 4768.
- 41 N. Acquista, S. Abramowitz, and D. R. Lide, *J. Chem. Phys.*, 1968, **49**, 780-782.
